# Supplementary material for: Promoting RNA helical stacking via A-minor junctions
Source: PubMed Central journal article supplement — Nucleic Acids Res. 2010 Sep 28;39(3):1066–80. doi: 10.1093/nar/gkq748 (PMC3035441; doi:10.1093/nar/gkq748), 2010-09-28
Supplement: supp_gkq748_SI_for_Geary_2010.pdf [file supp_gkq748_SI_for_Geary_2010.pdf]

**SUPPORTING INFORMATION for**  
**“Promoting RNA helical stacking via A-minor junctions”**  
 by Cody Geary, Arkadiusz Chworos and Luc Jaeger

## A. Supplemental Tables

**Table S1 A:** List of A-minor junction motifs identified in known X-ray atomic structures.

The location of the A-minor junction is specified by the nt positions of it (type I) A-minor bp interaction. The A-minor junction motif has been identified at **16** independent locations in **7** different families of RNA molecules (16S and 23S rRNA, RNase P RNA, group IA3 and group II introns and TPP and M-box riboswitches). Ec: *Escherichia coli*; Tt: *Thermus thermophilus*; Hm: *Haloarcula marismortui*. Bs: *Bacillus subtilis*; Bst: *Bacillus stearothermophilus*; Oi: *Oceanobacillus iheyensis*; 2x\_bulge; double bulge motif; 3WJ and 4WJ: three-way and four way junctions, respectively; a-d: at the level of their 2D structures, these junctions are part of more extended junctions (a, H30-31-32 is part of a 4WJ; b, H36-37-38-39 is part of a 6WJ; c, H67-68-69-70-71 is part of a 5WJ; d, these junctions are part of pseudoknots).

| RNA molecule            | PDB ID | Location A-minor A(n1):g(n2):c(n3) | Loop/receptor A-minor junction (A-min.J) motif (type of A-minor) | Junction type         | Figure              |
|-------------------------|--------|------------------------------------|------------------------------------------------------------------|-----------------------|---------------------|
| <b>16S rRNA</b>         |        |                                    |                                                                  |                       |                     |
| Ec_16S_rRNA             | 2AVY   | A196:G142:C221                     | GA/A-min.J (type I/II)                                           | 4WJ_ABCD              | S3                  |
| Tt_16S_rRNA             | 1J5E   | A196:G142:C221                     | GA/A-min.J (type I/II)                                           | 4WJ_ABCD              | S3                  |
| Ec_16S_rRNA             | 2AVY   | A959:G1221:C984                    | U(UAA)U triloop/helix A-min.J (type I/II)                        | 3WJ_ACD <sup>a</sup>  | 4                   |
| Tt_16S_rRNA             | 1J5E   | A959:G1221:C984                    | U(UAA)U triloop/helix A-min.J (type I/II)                        | 3WJ_ACD <sup>a</sup>  | 4                   |
| <b>23S rRNA</b>         |        |                                    |                                                                  |                       |                     |
| Ec_23S_rRNA             | 2AW4   | A819:G942:C837                     | Sarcin loop/helix A-min.J (type I)                               | 4WJ_ABCD <sup>b</sup> | S3                  |
| Tt_23S_rRNA             | 2J01   | A819:G942:C837                     | Sarcin loop/helix A-min.J (type I)                               | 4WJ_ABCD <sup>b</sup> | S3                  |
| Hm_23S_rRNA             | 1JJ2   | A912:U1041:C930                    | Sarcin loop/helix A-min.J (type I)                               | 4WJ_ABCD <sup>b</sup> | S3                  |
| Ec_23S_rRNA             | 2AW4   | A1085:G1055:C1104                  | U(UAA)A triloop/helix A-min.J (type I/II)                        | 4WJ_ABCD              | 4                   |
| Tt_23S_rRNA             | 2J01   | A1085:G1055:C1104                  | U(UAA)A triloop/helix A-min.J (type I/II)                        | 4WJ_ABCD              | 4                   |
| Hm_23S_rRNA             | 1JJ2   | A1189:G1159:C1208                  | C(UAA)G triloop/helix A-min.J (type I/II)                        | 4WJ_ABCD              | 4,S8C               |
| Ec_23S_rRNA             | 2AW4   | A1545:G1465:C1446                  | GA:NAA/helix A-min.J (type I/II)                                 | 4WJ_ABCD              | 4, 5B, 7C, 7A, S8D  |
| Tt_23S_rRNA             | 2J01   | A1545:G1465:C1446                  | GA:NAA/helix A-min.J (type I/II)                                 | 4WJ_ABCD              | 4                   |
| Hm_23S_rRNA             | 1JJ2   | A1632:G1568:C1553                  | GNRA/helix A-min.J (type I/II)                                   | 4WJ_ABCD              | 3A, 4, 7A, S6B, S8B |
| Ec_23S_rRNA             | 2AW4   | A1928:G1904:C1836                  | C(UAA)G triloop/2x_bulge A-min.J (type I/II)                     | 4WJ_ABCD <sup>c</sup> | 4, 6, S8H           |
| Tt_23S_rRNA             | 2J01   | A1928:G1904:C1836                  | C(UAA)G triloop/2x_bulge A-min.J (type I/II)                     | 4WJ_ABCD <sup>c</sup> | 4, 6                |
| Hm_23S_rRNA             | 1JJ2   | A1969:G1945:C1892                  | U(UAA)G triloop/2x_bulge A-min.J (type I/II)                     | 4WJ_ABCD <sup>c</sup> | 4, 6, 7B            |
| Ec_23S_rRNA             | 2AW4   | A1969:C1833:G1972                  | Bulged-G/helix A-min.J (type I/Ib)                               | 3WJ_ACD <sup>c</sup>  | S10                 |
| Tt_23S_rRNA             | 2J01   | A1969:U1833:A1972                  | Bulged-G/helix A-min.J (type I/Ib)                               | 3WJ_ACD <sup>c</sup>  | S10                 |
| Hm_23S_rRNA             | 1JJ2   | A2010:C1889:G2013                  | Bulged-G/helix A-min.J (type I/Ib)                               | 3WJ_ACD <sup>c</sup>  | S10                 |
| Ec_23S_rRNA             | 2AW4   | A2388:G2280:C2260                  | A:A internal loop/helix A-min.J (type I/I)                       | 3WJ_ACD <sup>d</sup>  | S10                 |
| Tt_23S_rRNA             | 2J01   | A2388:G2280:C2260                  | A:A internal loop/helix A-min.J (type I/I)                       | 3WJ_ACD <sup>d</sup>  | S10                 |
| Hm_23S_rRNA             | 1JJ2   | A2425:G2314:C2294                  | A:A internal loop/helix A-min.J (type I/I)                       | 3WJ_ACD <sup>d</sup>  | S10                 |
| Hm_23S_rRNA             | 1JJ2   | A243:G274:C376                     | Internal loop/helix A-min.J (type I/II)                          | 3WJ_ACD               | S10, 7G             |
| Ec_23S_rRNA             | 2AW4   | A2565:G2545:C2520                  | U(UAA)A T-loop/helix A-min.J (type I/II)                         | 4WJ_ABCD              | 4                   |
| Tt_23S_rRNA             | 2J01   | A2565:G2545:C2520                  | U(UAA)A T-loop/helix A-min.J (type I/II)                         | 4WJ_ABCD              | 4                   |
| Hm_23S_rRNA             | 1JJ2   | A2600:G2580:C2555                  | U(UAA)A T-loop/helix A-min.J (type I/II)                         | 4WJ_ABCD              | 4, 5B               |
| <b>RNase P type B</b>   |        |                                    |                                                                  |                       |                     |
| Bs                      | 1NBS   | A178:G132:C234                     | U(GAA)A triloop/helix A-min.J (type I/II)                        | 4WJ_ABCD              | 4                   |
| Bst                     | 2A64   | A188:G139:C244                     | U(GAA)A triloop/helix A-min.J (type I/II)                        | 4WJ_ABCD              | 4                   |
| <b>TPP riboswitch</b>   |        |                                    |                                                                  |                       |                     |
|                         | 2CKY   | A72:C38:G8                         | GA:AA@helix-end/helix A-min.J (type I/I)<br>(Expanded kink turn) | 3WJ_ABC               | S10, 7D             |
|                         | 2GDI   | A84:C50:G16                        | GA_shared/helix A-min.J (type I/I)<br>(Expanded kink turn)       | 3WJ_ABC               | S10                 |
|                         | 2CKY   | G30:G11:G34                        | T-loop/helix A-min.J (type I/II)                                 | 3WJ_ACD               | S3                  |
|                         | 2GDI   | G42:G19:A47                        | T-loop/helix A-min.J (type I/II)                                 | 3WJ_ACD               | S3                  |
| <b>M-Box riboswitch</b> |        |                                    |                                                                  |                       |                     |
|                         | 2QBZ   | A117:G84:C57                       | UA_h/ helix A-min.J (type I/Ib)                                  | 3WJ_ABC               | S10                 |
| <b>Group I intron</b>   |        |                                    |                                                                  |                       |                     |
| Twort intron            | 1Y0Q   | A157:U125:A189                     | Bulged-G/helix A-min.J (type I/Ib)                               | 3WJ_ACD <sup>d</sup>  | S10                 |
| <b>Group II intron</b>  |        |                                    |                                                                  |                       |                     |
| Oi intron               | 3BWP   | A49:C197:A189                      | Bulged-G/helix A-min.J (type I)                                  | 3WJ_ACD <sup>d</sup>  | S10, 7F             |

**Table S1 B:** List of 2bp\_double\_bulge motifs (2bp\_2x\_bulge) identified in known X-ray atomic structures. The location of the 2x\_bulge is specified by the two middle WC bps. The S8-like and P12-like 2bp\_2x\_bulge motifs have been identified at **2** and **4** independent locations, respectively. Tma: *Thermatoga maritima*.

| RNA molecule       | PDB ID | RNA motif (location with 2D structure) | WC bps location Xa(n1)Ya:Yb(n2)Xb | Modularity                        | Figure        |
|--------------------|--------|----------------------------------------|-----------------------------------|-----------------------------------|---------------|
|                    |        | <i>S8-like</i><br><i>2bp_2x_bulge</i>  |                                   |                                   |               |
| <b>16S_rRNA</b>    |        |                                        |                                   |                                   |               |
| Ec_16S_rRNA        | 2AVY   | H21                                    | A596G:C643U                       | S8 binding site                   | S7A           |
| Tt_16S_rRNA        | 1J5E   | H21                                    | C596G:C643G                       | S8 binding site                   | S7A           |
| <b>23S_rRNA</b>    |        |                                        |                                   |                                   |               |
| Ec_23S_rRNA        | 2AW4   | H89                                    | A2459U:U2492U                     | GNRA-like/receptor interaction    | S7A           |
| Tt_23S_rRNA        | 2J01   | H89                                    | A2459U:U2492U                     | GNRA-like/receptor interaction    | S7A           |
| Hm_23S_rRNA        | 1JJ2   | H89                                    | G2494U:U2527U                     | GNRA-like/receptor interaction    | S7A ,S7B, S8I |
|                    |        | <i>P12-like</i><br><i>2bp_2x_bulge</i> |                                   |                                   |               |
| <b>23S_rRNA</b>    |        |                                        |                                   |                                   |               |
| Ec_23S_rRNA        | 2AW4   | H68                                    | G1840U:A1901C                     | triloop/2x_bulge A-minor junction | 6, S8H        |
| Tt_23S_rRNA        | 2J01   | H68                                    | G1840U:A1901C                     | triloop/2x_bulge A-minor junction | 6             |
| Hm_23S_rRNA        | 1JJ2   | H68                                    | G1896U:A1942C                     | triloop/2x_bulge A-minor junction | 6, 7B         |
| <b>5S_rRNA</b>     |        |                                        |                                   |                                   |               |
| Ec_5S_rRNA         | 2AW4   | H2                                     | G0016C:G0067C                     | Loop A 3WJ-BCD                    |               |
| Tt_5S_rRNA         | 2J01   | H2                                     | G0016C:G0067C                     | Loop A 3WJ-BCD                    |               |
| Hm_5S_rRNA         | 1JJ2   | H2                                     | G0014C:G0066C                     | Loop A 3WJ-BCD                    |               |
| <b>RNase P RNA</b> |        |                                        |                                   |                                   |               |
| Bs Type B          | 1NBS   | P10/P11                                | G0180U:A0321C                     | triloop/helix A-minor junction    | 4             |
| Bst Type B         | 2A64   | P10/P11                                | G0190U:A0241C                     | triloop/helix A-minor junction    | 4             |
| Tma Type A         | 2A2E   | P10/P11                                | G0107G:C0199C                     |                                   |               |
| Tt Type A          | 1U9S   | P10/P11                                | G0115U:A0227C                     |                                   |               |
| Tt Type A          | 1U9S   | P12/P13                                | C0139G:C0160G                     | triloop/2bp_2x_bulge interaction  | 5B, S8G       |

**Table S2:** List of the sequences of all the tectoRNA molecules used in this study

| Name                | Sequence                                                                                    |
|---------------------|---------------------------------------------------------------------------------------------|
| GAAA/CA:UG_A (wt)   | GGAUGGGAAACGUGGUCCGAUCUGAAGGAGGCACGGAUUGGACUACGCUAAGUCGAUG<br>AAGUGGACACGUCGAUUUAGUCAUUCUU  |
| GAAA/CA:UG_B (wt)   | GGAUGGGAAACGUGGUCCGAUCUGAAGUCCACACGGAUUGGACUACGCUAAGUCGAUG<br>AAGCCUCCACGUCGAUUUAGUCAUUCUU  |
| GUGA/CA:UG_A        | GGAUGGGUGACGUGGUCCGAUCUGAAGGAGGCACGGAUUGGACUACGCUAAGUCGAUG<br>AAGUGGACACGUCGAUUUAGUCAUUCUU  |
| GUGA/CA:UG_B        | GGAUGGGUGACGUGGUCCGAUCUGAAGUCCACACGGAUUGGACUACGCUAAGUCGAUG<br>AAGCCUCCACGUCGAUUUAGUCAUUCUU  |
| UUCG/CA:UG_A        | GGAUGGUUCGCGUGGUCCGAUCUGAAGGAGGCACGGAUUGGACUACGCUAAGUCGAUG<br>AAGUGGACACGUCGAUUUAGUCAUUCUU  |
| UUCG/CA:UG_B        | GGAUGGUUCGCGUGGUCCGAUCUGAAGUCCACACGGAUUGGACUACGCUAAGUCGAUG<br>AAGCCUCCACGUCGAUUUAGUCAUUCUU  |
| GAAA/GG:CC_A        | GGAUGGGAAACGUGGUCCGAUCUGAAGGAGGCACGGAUUGGACUACGCCAAGUCGAUG<br>AAGUGGACACGUCGAUUUGGUCAUUCUU  |
| GAAA/GG:CC_B        | GGAUGGGAAACGUGGUCCGAUCUGAAGUCCACACGGAUUGGACUACGCCAAGUCGAUG<br>AAGCCUCCACGUCGAUUUGGUCAUUCUU  |
| GUAA/GG:CC_A        | GGAUGGGUAAACGUGGUCCGAUCUGAAGGAGGCACGGAUUGGACUACGCCAAGUCGAUG<br>AAGUGGACACGUCGAUUUGGUCAUUCUU |
| GUAA/GG:CC_B        | GGAUGGGUAAACGUGGUCCGAUCUGAAGUCCACACGGAUUGGACUACGCCAAGUCGAUG<br>AAGCCUCCACGUCGAUUUGGUCAUUCUU |
| UUAAA/GG:CC_A       | GGAUGUUAAAAGUGGUCCGAUCUGAAGGAGGCACGGAUUGGACUACGCCAAGUCGAUGA<br>AGUGGACACGUCGAUUUGGUCAUUCUU  |
| UUAAA/GG:CC_B       | GGAUGUUAAAAGUGGUCCGAUCUGAAGUCCACACGGAUUGGACUACGCCAAGUCGAUGA<br>AGCCUCCACGUCGAUUUGGUCAUUCUU  |
| CUAAG/GG:CC_A       | GGAUGCUAAGGUGGUCCGAUCUGAAGGAGGCACGGAUUGGACUACGCCAAGUCGAUGA<br>AGUGGACACGUCGAUUUGGUCAUUCUU   |
| CUAAG/GG:CC_B       | GGAUGCUAAGGUGGUCCGAUCUGAAGUCCACACGGAUUGGACUACGCCAAGUCGAUGA<br>AGCCUCCACGUCGAUUUGGUCAUUCUU   |
| UUAAG/GG:CC_A       | GGAUGUUAAAGGUGGUCCGAUCUGAAGGAGGCACGGAUUGGACUACGCCAAGUCGAUGA<br>AGUGGACACGUCGAUUUGGUCAUUCUU  |
| UUAAG/GG:CC_B       | GGAUGUUAAAGGUGGUCCGAUCUGAAGUCCACACGGAUUGGACUACGCCAAGUCGAUGA<br>AGCCUCCACGUCGAUUUGGUCAUUCUU  |
| GAAA/11nt motif_A   | GGAUGGGAAACGUGGUCCGAUCUGAAGGAGGCACGGAUUGGACUACGCUAAGUCGAUG<br>AAGUGGACACGUCGAUAUGUCAUUCUU   |
| GAAA/11nt motif_B   | GGAUGGGAAACGUGGUCCGAUCUGAAGUCCACACGGAUUGGACUACGCUAAGUCGAUG<br>AAGCCUCCACGUCGAUAUGUCAUUCUU   |
| GGAA/11nt motif_A   | GGAUGGGGAACGUGGUCCGAUCUGAAGGAGGCACGGAUUGGACUACGCUAAGUCGAUG<br>AAGUGGACACGUCGAUAUGUCAUUCUU   |
| GGAA/11nt motif_B   | GGAUGGGGAACGUGGUCCGAUCUGAAGUCCACACGGAUUGGACUACGCUAAGUCGAUG<br>AAGCCUCCACGUCGAUAUGUCAUUCUU   |
| GGAA/R1_A           | GGAUGGGGAACGUGGUCCGAUCUGAAGGAGGCACGGAUUGGACUACGUCUGUCGAUG<br>AAGUGGACACGUCGAAUCUGUCAUUCUU   |
| GGAA/R1_B           | GGAUGGGGAACGUGGUCCGAUCUGAAGUCCACACGGAUUGGACUACGUCUGUCGAUG<br>AAGCCUCCACGUCGAAUCUGUCAUUCUU   |
| GAAA/R1_A           | GGAUGGGAAACGUGGUCCGAUCUGAAGGAGGCACGGAUUGGACUACGUCUGUCGAUG<br>AAGUGGACACGUCGAAUCUGUCAUUCUU   |
| GAAA/R1_B           | GGAUGGGAAACGUGGUCCGAUCUGAAGUCCACACGGAUUGGACUACGUCUGUCGAUG<br>AAGCCUCCACGUCGAAUCUGUCAUUCUU   |
| UUAAG_H68_Hm_A (wt) | GGAUGUUAAAGGUGGUCCGAUCUGAAGGAGGCACGGAUUGGACUACGCCAGUGCGAUG<br>AAGUGGACACGUCGUAACGGUCAUUCUU  |
| UUAAG/H68_Hm_B (wt) | GGAUGUUAAAGGUGGUCCGAUCUGAAGUCCACACGGAUUGGACUACGCCAGUGCGAUG<br>AAGCCUCCACGUCGUAACGGUCAUUCUU  |
| CUAAG/H68_Hm_A      | GGAUGCUAAGGUGGUCCGAUCUGAAGGAGGCACGGAUUGGACUACGCCAGUGCGAUG<br>AAGUGGACACGUCGUAACGGUCAUUCUU   |
| CUAAG/H68_Hm_B      | GGAUGCUAAGGUGGUCCGAUCUGAAGUCCACACGGAUUGGACUACGCCAGUGCGAUG<br>AAGCCUCCACGUCGUAACGGUCAUUCUU   |
| UUAUG/H68_Hm_A      | GGAUGUUAAUGGUGGUCCGAUCUGAAGGAGGCACGGAUUGGACUACGCCAGUGCGAUG<br>AAGUGGACACGUCGUAACGGUCAUUCUU  |
| UUAUG/H68_Hm_B      | GGAUGUUAAUGGUGGUCCGAUCUGAAGUCCACACGGAUUGGACUACGCCAGUGCGAUG<br>AAGCCUCCACGUCGUAACGGUCAUUCUU  |
| CUAAG/H68_Ec_A (wt) | GGAUGCUAAGGUGGUCCGAUCUGAAGGAGGCACGGAUUGGACUACGCCGGUGCGAUG<br>AAGUGGACACGUCGUAACGGUCAUUCUU   |

|                            |                                                                                                       |
|----------------------------|-------------------------------------------------------------------------------------------------------|
| CUAAG/H68_Ec_B (wt)        | GGAUGCUAAGGUGGUCCGAUCUGAAGUCCACACGGAUUGGACUACGCCCGGUGCGAUG<br>AAGCCUCCACGUCGUAACGGUCAUUCUU            |
| CUAAG/H68_Tt_A (wt)        | GGAUGCUAAGGUGGUCCGAUCUGAAGGAGGCACGGAUUGGACUACGCCCGGUGCGAUG<br>AAGUGGACACGUCGUGAACGGUCAUUCUU           |
| CUAAG/H68_Tt_B (wt)        | GGAUGCUAAGGUGGUCCGAUCUGAAGUCCACACGGAUUGGACUACGCCCGGUGCGAUG<br>AAGCCUCCACGUCGUGAACGGUCAUUCUU           |
| UUAAG/H68_Sc_A (wt)        | GGAUGUUAAGGUGGUCCGAUCUGAAGGAGGCACGGAUUGGACUACGCCAGUGCGAUG<br>AAGUGGACACGUCGUAACGGUCAUUCUU             |
| UUAAG/H68_Sc_B (wt)        | GGAUGUUAAGGUGGUCCGAUCUGAAGUCCACACGGAUUGGACUACGCCAGUGCGAUG<br>AAGCCUCCACGUCGUAACGGUCAUUCUU             |
| CUAAG/P12_(#A)_A           | GGAUGCUAAGGUGGUCCGAUCUGAAGGAGGCACGGAUUGGACUACGCCAGCGGCGAUG<br>AAGUGGACACGUCGUGCGGGUCAUUCUU            |
| CUAAG/P12_(#A)_B           | GGAUGCUAAGGUGGUCCGAUCUGAAGUCCACACGGAUUGGACUACGCCAGCGGCGAUG<br>AAGCCUCCACGUCGUGCGGGUCAUUCUU            |
| CUAAG/P12_neg(#A)_A        | GGAUGCUAAGGUGGUCCGAUCUGAAGGAGGCACGGAUUGGACUACGCCACGGCGAUGA<br>AGUGGACACGUCGUGCGGGUCAUUCUU             |
| CUAAG/P12_neg(#A)_B        | GGAUGCUAAGGUGGUCCGAUCUGAAGUCCACACGGAUUGGACUACGCCACGGCGAUGA<br>AGCCUCCACGUCGUGCGGGUCAUUCUU             |
| CUAUG/P12_(#A)_A           | GGAUGCUAUGGUGGUCCGAUCUGAAGGAGGCACGGAUUGGACUACGCCAGCGGCGAUG<br>AAGUGGACACGUCGUGCGGGUCAUUCUU            |
| CUAUG/P12_(#A)_B           | GGAUGCUAUGGUGGUCCGAUCUGAAGUCCACACGGAUUGGACUACGCCAGCGGCGAUG<br>AAGCCUCCACGUCGUGCGGGUCAUUCUU            |
| CUAAG/P12_(#B)_A           | GGAUGCUAAGGUGGUCCGAUCUGAAGGAGGCACGGAUUGGACUACGCCGAUGGCGAUG<br>AAGUGGACACGUCGAUCAGGUCAUUCUU            |
| CUAAG/P12_(#B)_B           | GGAUGCUAAGGUGGUCCGAUCUGAAGUCCACACGGAUUGGACUACGCCGAUGGCGAUG<br>AAGCCUCCACGUCGAUCAGGUCAUUCUU            |
| CUAAG/P12_(#C)_A           | GGAUGCUAAGGUGGUCCGAUCUGAAGGAGGCACGGAUUGGACUACGCCGAUGGCGAUG<br>AAGUGGACACGUCGCACAGGUCAUUCUU            |
| CUAAG/P12_(#C)_B           | GGAUGCUAAGGUGGUCCGAUCUGAAGUCCACACGGAUUGGACUACGCCGAUGGCGAUG<br>AAGCCUCCACGUCGCACAGGUCAUUCUU            |
| Internal_GNRA/H57_Ec_A     | GGAUGCGAGCUUCGGUGAAGGUGGUCCGAUCUGAAGGAGGCACGGAUUGGACUACGCC<br>AAGUCGAUGAAGUGGACACGUCGAUUUGGUCAUUCUU   |
| Internal_GNRA/H57_Ec_B     | GGAUGCGAGCUUCGGUGAAGGUGGUCCGAUCUGAAGUCCACACGGAUUGGACUACGCC<br>AAGUCGAUGAAGCCUCCACGUCGAUUUGGUCAUUCUU   |
| Internal_GNRA/H57_Ec_neg_A | GGAUGCGAGCUUCGGUGACGGUGGUCCGAUCUGAAGGAGGCACGGAUUGGACUACGCC<br>AAGUCGAUGAAGUGGACACGUCGAUUUGGUCAUUCUU   |
| Internal_GNRA/H57_Ec_neg_B | GGAUGCGAGCUUCGGUGACGGUGGUCCGAUCUGAAGUCCACACGGAUUGGACUACGCC<br>AAGUCGAUGAAGCCUCCACGUCGAUUUGGUCAUUCUU   |
| UA_h_GNRA/U999_A           | GGAUGCGAAGCUUCGGCUAAGGUGGUCCGAUCUGAAGUCCACACGGAUUGGACUACGC<br>CAAGUCGAUGAAGUGGACACGUCGAUUUGGUCAUUCUU  |
| UA_h_GNRA/U999_B           | GGAUGCGAAGCUUCGGCUAAGGUGGUCCGAUCUGAAGUCCACACGGAUUGGACUACGC<br>CAAGUCGAUGAAGCCUCCACGUCGAUUUGGUCAUUCUU  |
| UA_h_GNRA/U999_neg_A       | GGAUGCGAAGCUUCGGCUACGGUGGUCCGAUCUGAAGGAGGCACGGAUUGGACUACGC<br>CAAGUCGAUGAAGUGGACACGUCGAUUUGGUCAUUCUU  |
| UA_h_GNRA/U999_neg_B       | GGAUGCGAAGCUUCGGCUACGGUGGUCCGAUCUGAAGUCCACACGGAUUGGACUACGC<br>CAAGUCGAUGAAGCCUCCACGUCGAUUUGGUCAUUCUU  |
| Hairpin Junction (fiber)_A | GGGAACCUGAGGUUCGCUCAACCGUCCGAUCUGAAGGAGGCACGGAUUGGACGGUAC<br>GAAGUCGAUGAAGUGGACACGUCGAUUUCGUGGUUCUU   |
| Hairpin Junction (fiber)_B | GGGAACCUGAGGUUCGCUCAACCGUCCGAUCUGAAGUCCACACGGAUUGGACGGUAC<br>GAAGUCGAUGAAGCCUCCACGUCGAUUUCGUGGUUCUU   |
| Hairpin Junction (dimer)_A | GGGACGUGGUGGUUCGCUACCUGAGUCCGAUCUGAAGGAGGCACGGAUUGGACUCAAC<br>CAAGUCGAUGAAGUGGACACGUCGAUUUGGUACGUCCUU |
| Hairpin Junction (dimer)_B | GGGACGUGGUGGUUCGCUACCUGAGUCCGAUCUGAAGUCCACACGGAUUGGACUCAAC<br>CAAGUCGAUGAAGCCUCCACGUCGAUUUGGUACGUCCUU |

## B. Supplementary References

1. Leontis, N.B. and Westhof, E. (2001) Geometric nomenclature and classification of RNA base pairs. *RNA*, **7**, 499-512.
2. DeLano, W.L. (2002) The PyMOL Molecular Graphics System.

## C. Supplementary Information Figure Captions

**Figure S1: Three-dimensional models of RNA four-way junction conformers.** The conformers I, II, III, IV and O predicted for RNA four-way junctions presented in Figure 1 were modeled in Swiss PDB viewer and rendered as three-dimensional stereo-view images.

**Figure S2: Study of hairpin ribozyme junction.** (A) The four-way junction of the hairpin ribozyme within its natural context, including the adjacent tertiary interaction. (B) H40-H41-H45 consensus from the 23S rRNAs from Archaea and Bacteria has similarities to the hairpin ribozyme junction, including a neighboring tertiary interaction at a similar distance from the junction. (C) Self-assembly native PAGE experiments with 4WJ-tectoRNAs taking advantage of hairpin ribozyme 4WJ junction in two different orientations. The gels were measured in presence of 1 mM Mg(OAc)<sub>2</sub> and TB 1X (see Materials and Methods). Lane m corresponds to the monomer A alone.

**Figure S3: Extended A-minor junction network.** Extended version of the network described in Figure 4, containing all identified A-minor junctions. Submotifs combine in multiple ways to generate a variety of functionally equivalent A-minor junction motifs. The lines on the network indicate which motifs can be combined. Interactions are indicated according to the Leontis-Westhof nomenclature (1) (see in box Legend).

**Figure S4: Kissing loops used for 4WJ-tectoRNAs self-assembly.** (A) Three-dimensional view of the DIS HIV kissing-loop (KL) interaction (PDB\_ID: 1JJM) and motif diagram. (B) Schematic of the two different KL interactions L1-L1' and L2-L2' used in this study.

**Figure S5: AFM analysis.** (A) Representative AFM images of GUGA/CU:AG 4WJ-tectoRNA nano-rings. (B) Histogram of the size distribution of nano-rings observed in the images from A. (C) The periodicity observed of bumpy features along one-dimensional tectoRNA fibers by AFM can vary related to the bending of the fibers. In the model of the conformer I fibers the 4WJ motif creates a bulky density with a periodic spacing between units of approximately ~9 nm. By AFM analysis, this periodic spacing is closer to ~10 nm, likely due to bending. To describe the shape expected for the rings composed of end-to-end assembled units, products of the intermediate-length assembly were expected to have a circumference of length approximately 2N\*(periodicity), where N is an integer greater than 1. A value of ~11 nm was measured for the periodicity in ring-circumferences. Experiments were performed as described in Materials and Methods.

**Figure S6: Additional PAGE gels.** (A) Self-assembly PAGE assay for composite GGAA/R(1)-receptor 4WJ tectoRNAs. (B) PAGE gels demonstrating the effect of combining different A+B units in the same assembly. Experiments were performed as described in Materials and Methods. (left to right) GAAA/CU:AG (A+B), GAAA/CU:AG (A) + GUAA/GG:CC (B), GUAA/GG:CC (A) + GAAA/CU:AG (B), GUAA/GG:CC (A+B). Lane m corresponds to the monomer A alone.

**Figure S7: Study of GNRA-like/receptor interactions.** (A) GNRA-like/receptor motif network showing the modularity of GA:NAA/helix, UAA:GAN/helix and L39-H89 motifs. Interactions are indicated according to the Leontis Westhof nomenclature (1) (see in box Legend in Figure S3). (B) Corresponding gel experiments with 4WJ-tectoRNAs taking advantage of GNRA-like motifs.

**Figure S8: Three-dimensional representations of various A-minor interactions.** On the left are shown a series of loop/helix A-minor interactions and junctions, on the right are loop/receptor A-minor interactions and junctions. In the stereo images, the interacting adenine loop is colored green. The Type I

A-minor binding site is colored blue while the Type II A-minor binding site is orange. All the A-minor loop/receptor interactions depicted include nt platforms shown in yellow with surface. Note that the color code on 2D diagrams does not correspond to the one on the 3D stereo images. **(A)** GyRA/helix A-minor interaction (Type I/IIP) (PDB\_ID: 1JJ2); **(B)** GNRA/helix A-minor junction (Type I/IIP) (PDB\_ID: 1JJ2); **(C)** triloop/helix A-minor junction (Type I/IIP) (PDB\_ID: 1JJ2); **(D)** GA:NAA/helix A-minor junction (Type I/IIP) (PDB\_ID: 2AW4); **(E)** UAA:GAN/helix A-minor interaction (Type I/IIT) (PDB\_ID: 2AW4); **(F)** GAAA/1Int-motif A-minor interaction (Type I/IIT) (PDB\_ID: 1U6B); **(G)** L13-loop/P12-receptor A-minor interaction (Type I/IIT) (PDB\_ID: 1U9S); **(H)** L70-triloop/H68-receptor A-minor junction (Type I/IIT) (PDB\_ID: 2AW4); **(I)** GNRA-like/S8-like receptor A-minor interaction (Type I/IIT) (L39-H89) (PDB\_ID: 1JJ2). Images were rendered in Pymol (2).

**Figure S9: Non-stoichiometric assemblies.** Native PAGE assembly of non-stoichiometric mixes of tectoRNA fiber units A+B. By increasing the ratio of molecule B to molecule A, the self-assembly equilibrium is shifted towards the formation of B-A-B trimers. This was used to differentiate between the opened and cyclic dimers, and linear trimer. The experiment highlights differences between two functional classes of 4WJ motifs: more-flexible and more-rigid.

**Figure S10: Three-way junction A-minor network.** Extended A-minor motif network describing all the various A-minor junctions (3WJ) and their relationship with the Kink turn motif. Interactions are indicated according to the Leontis-Westhof nomenclature (1) (see in box Legend).

## D. Supplementary Figures

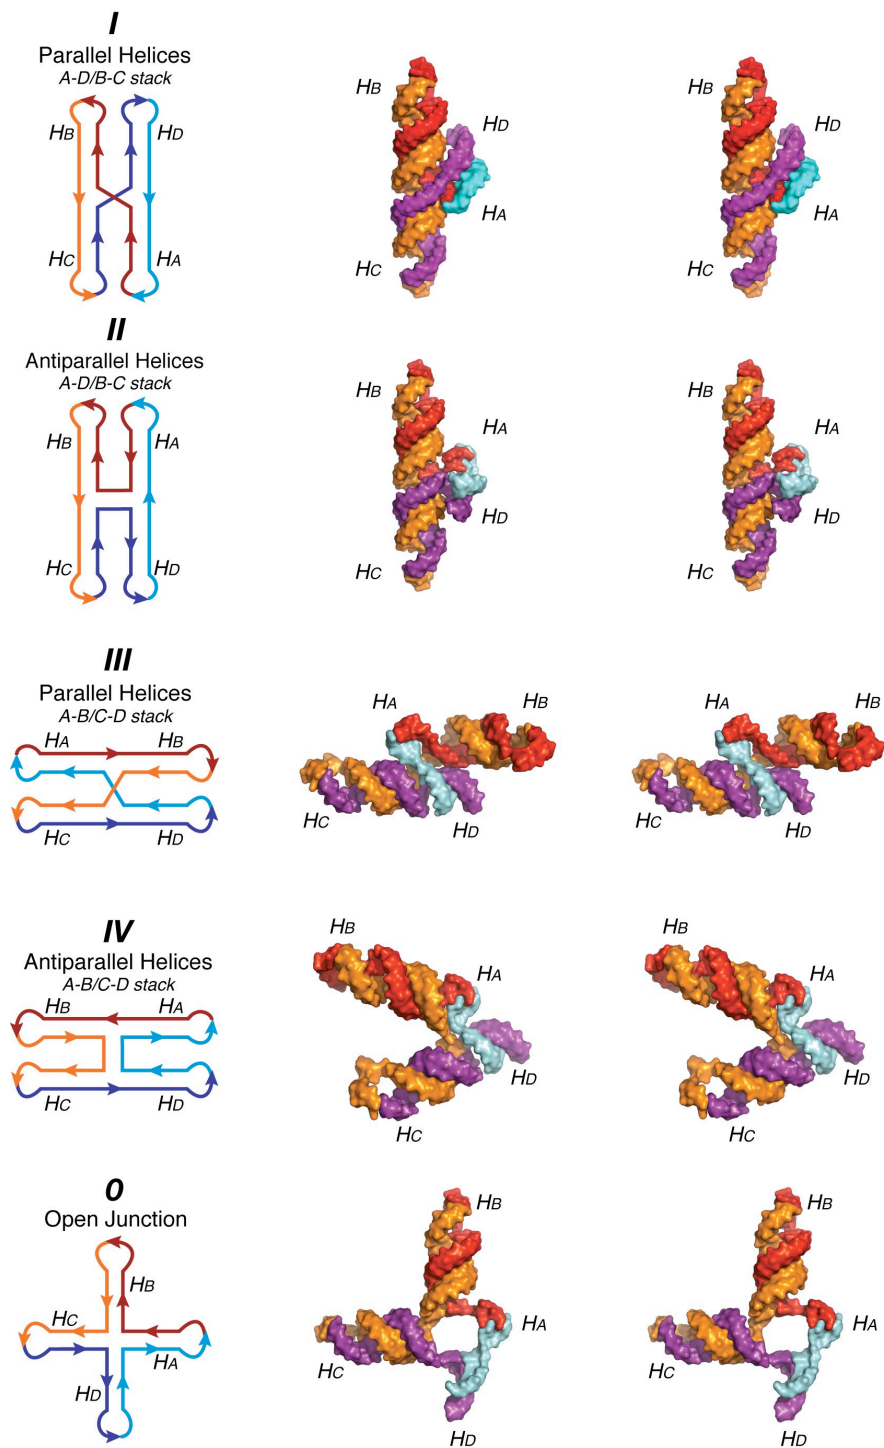

Figure S1

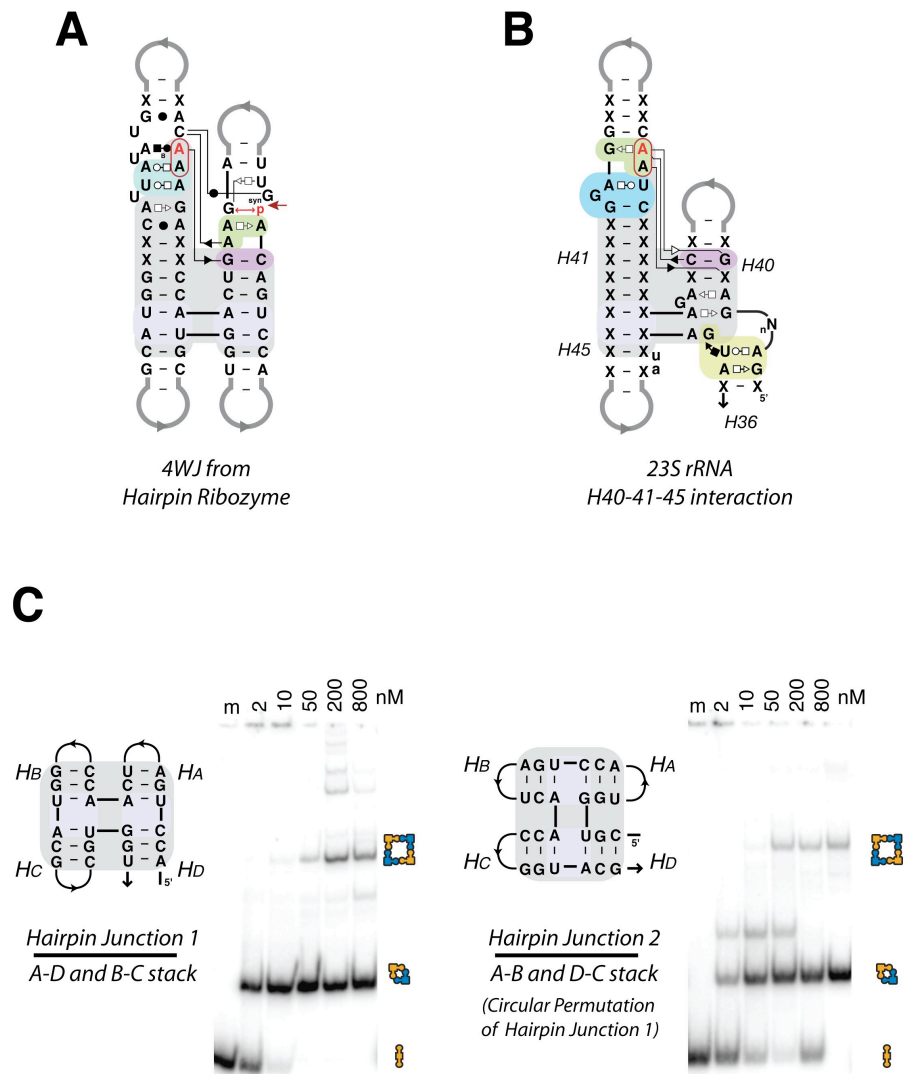

Figure S2



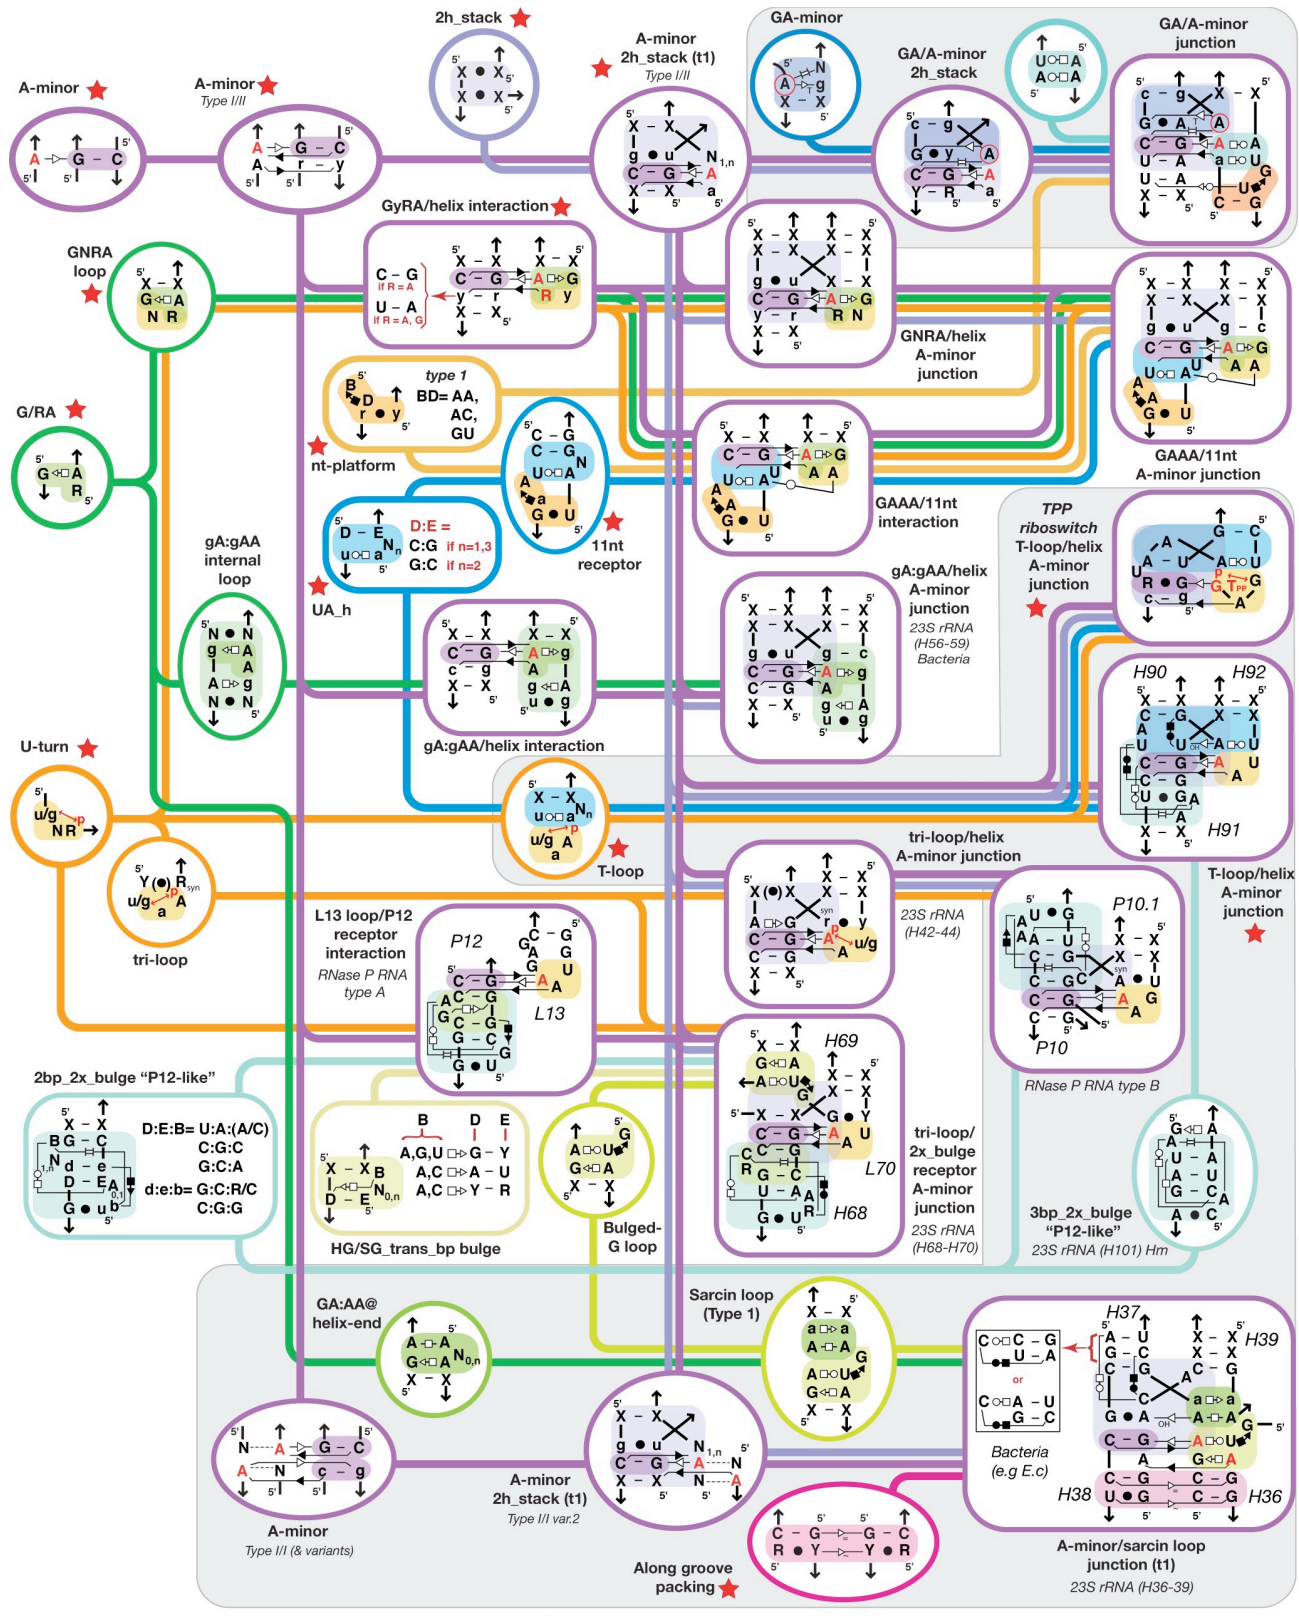

**Extended A-minor (4WJ) junction network**

| Legend |       | cis trans |       | bp |                            | 3' end |             | Interaction      |      | Points of connection to the UA <sub>n</sub> network (Jaeger et al. (2009)) |  |
|--------|-------|-----------|-------|----|----------------------------|--------|-------------|------------------|------|----------------------------------------------------------------------------|--|
| cis    | trans | bp        | WC:SG | →  | 3' end                     | ↖      | Interaction | SG:2'OH          | ★    | Points of connection to the UA <sub>n</sub> network (Jaeger et al. (2009)) |  |
| -      | WC:WC | ●         | HG:HG | →  | Any bp interaction         | ↖      | S, syn      | nt in syn        | N    | any nt                                                                     |  |
| ○      | WC:HG | ■         | HG:SG | →  | Stacking interaction       | ↖      | X           | any WC paired nt | R, r | any purine                                                                 |  |
| ●      | WC:WC | ▶         | SG:SG | →  | Base-phosphate interaction | ↖      | Y, y        | any pyrimidine   | B    | Interaction bifurcated                                                     |  |
| ○      | WC:HG | ▶         | SG:SG | →  | nt with C2'endo pucker     | ↖      |             |                  | X    | Interaction twisted                                                        |  |
|        |       |           |       |    |                            |        |             |                  | ST   | Interaction super twisted                                                  |  |
|        |       |           |       |    |                            |        |             |                  | =    | Interaction symmetrical                                                    |  |
|        |       |           |       |    |                            |        |             |                  | -    | Interaction quasi-symmetrical                                              |  |

**Figure S3**

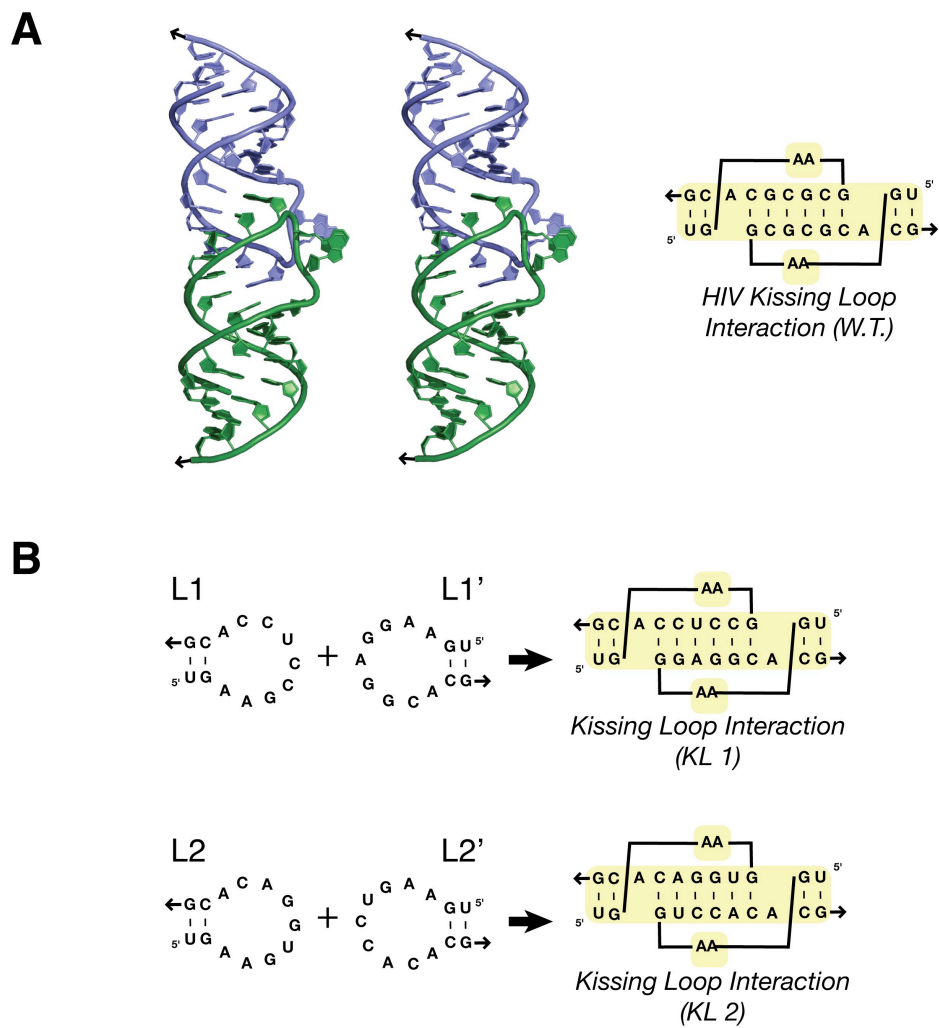

Figure S4

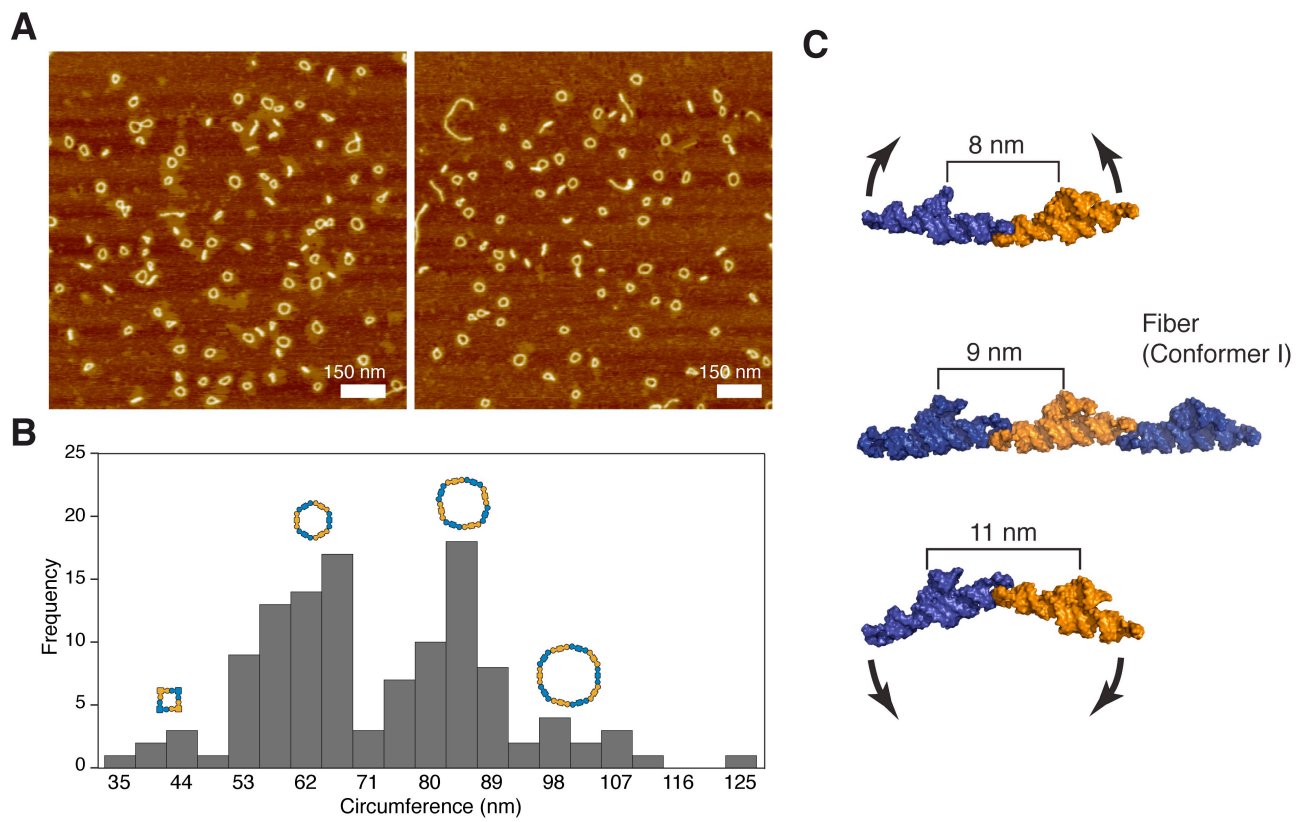

Figure S5

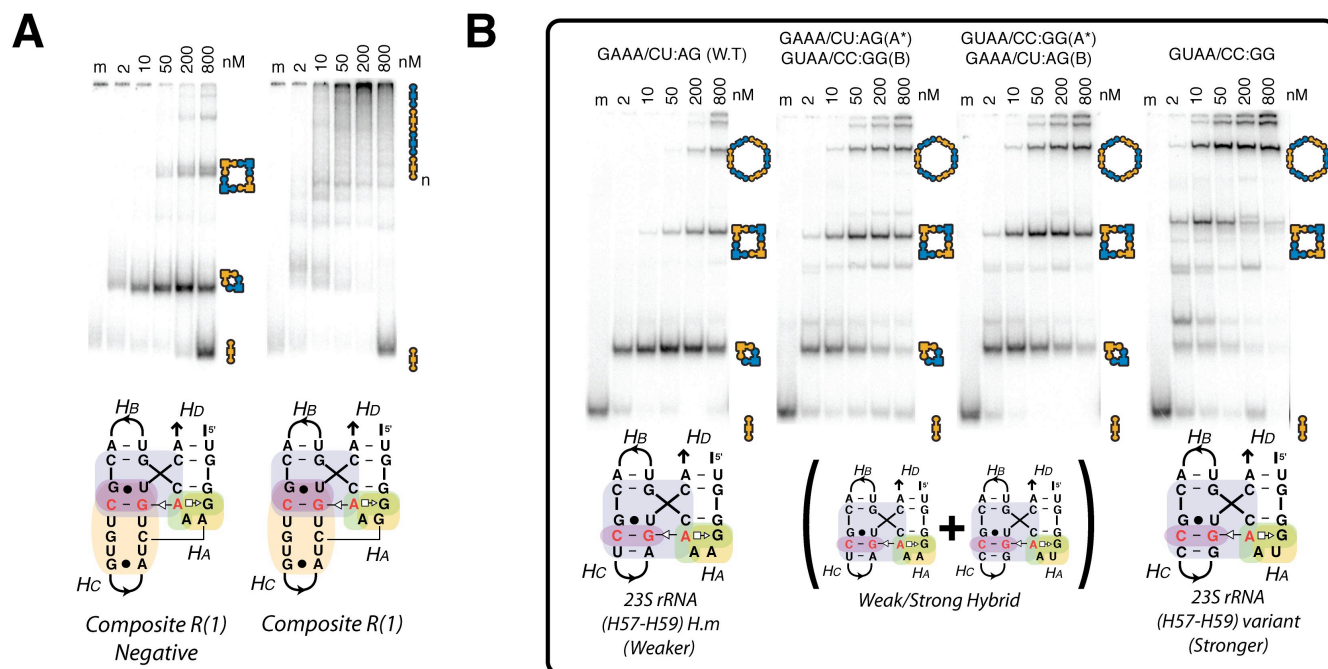

Figure S6

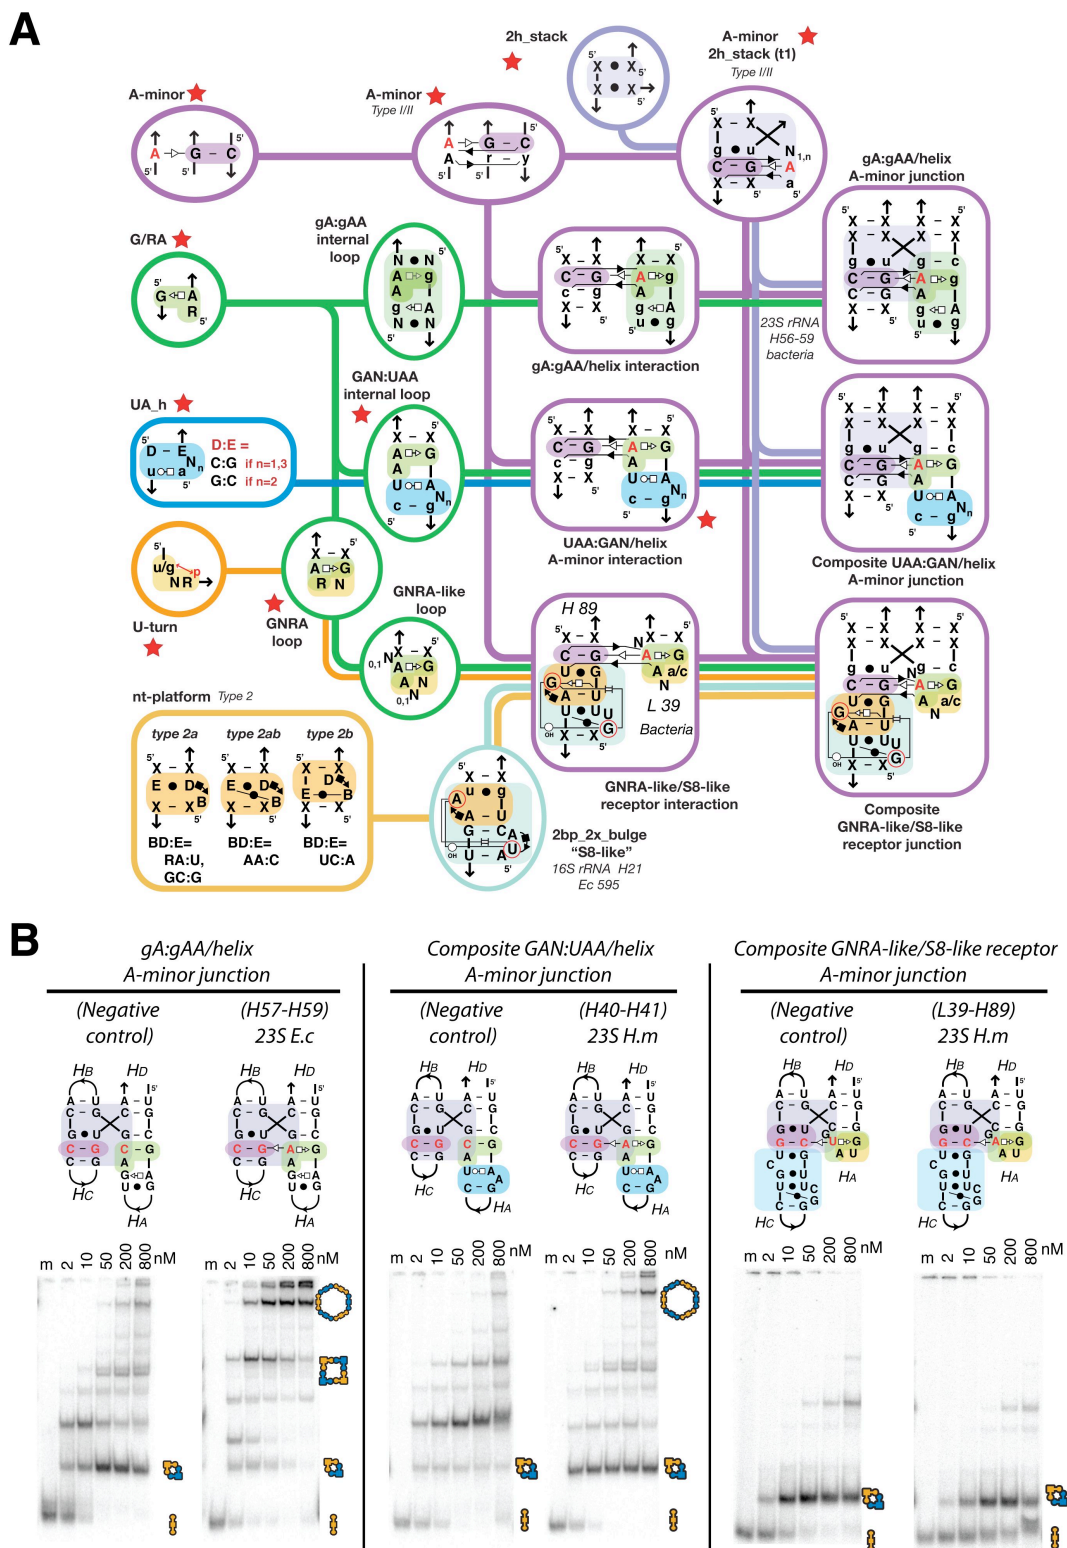

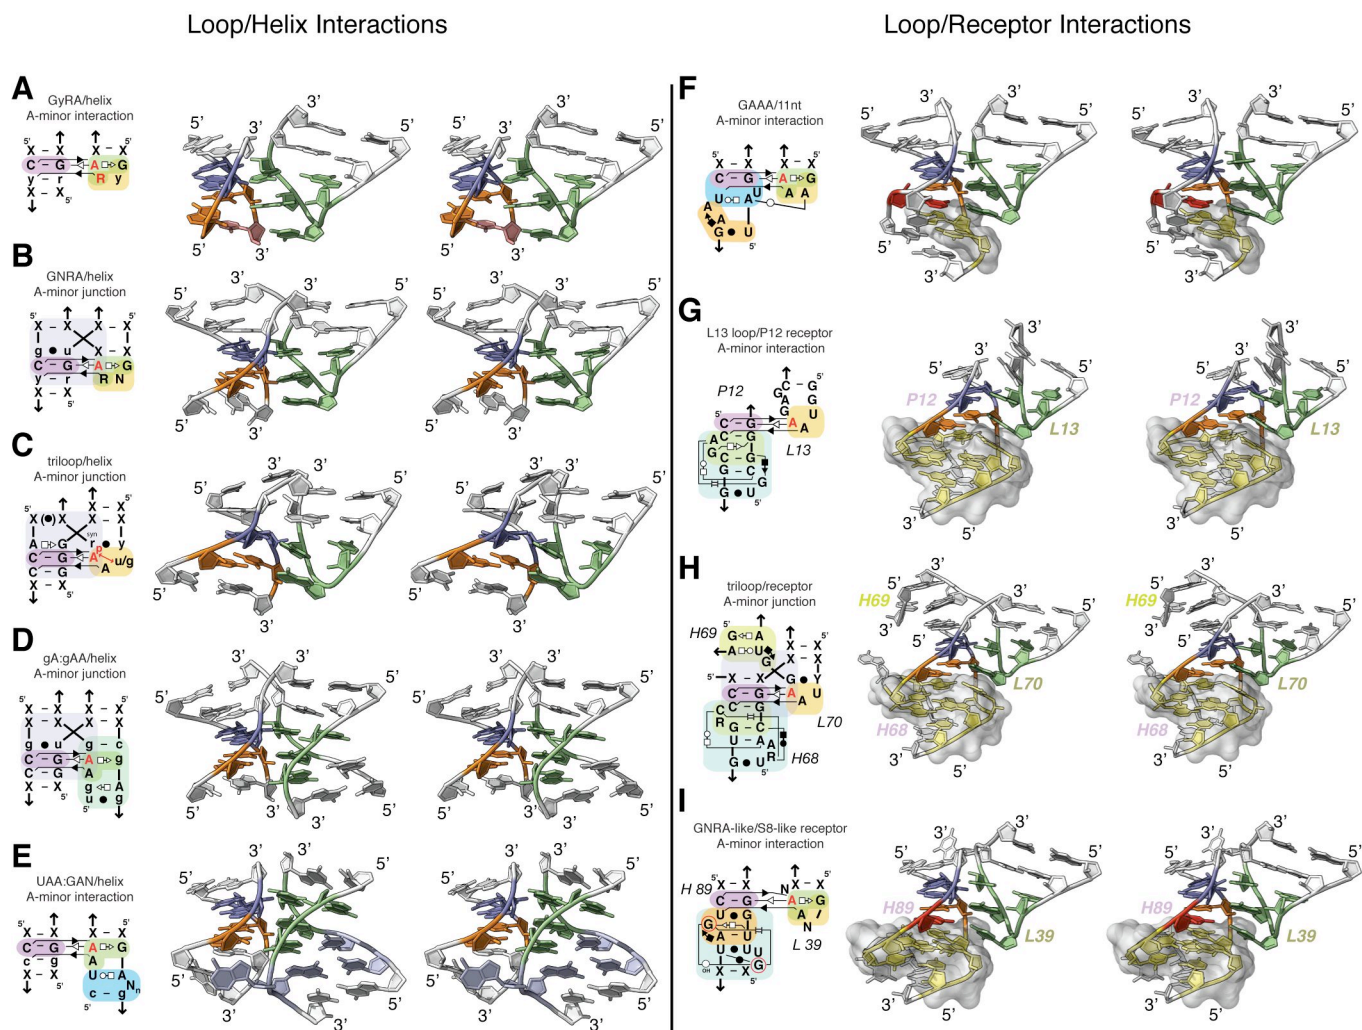

Figure S8

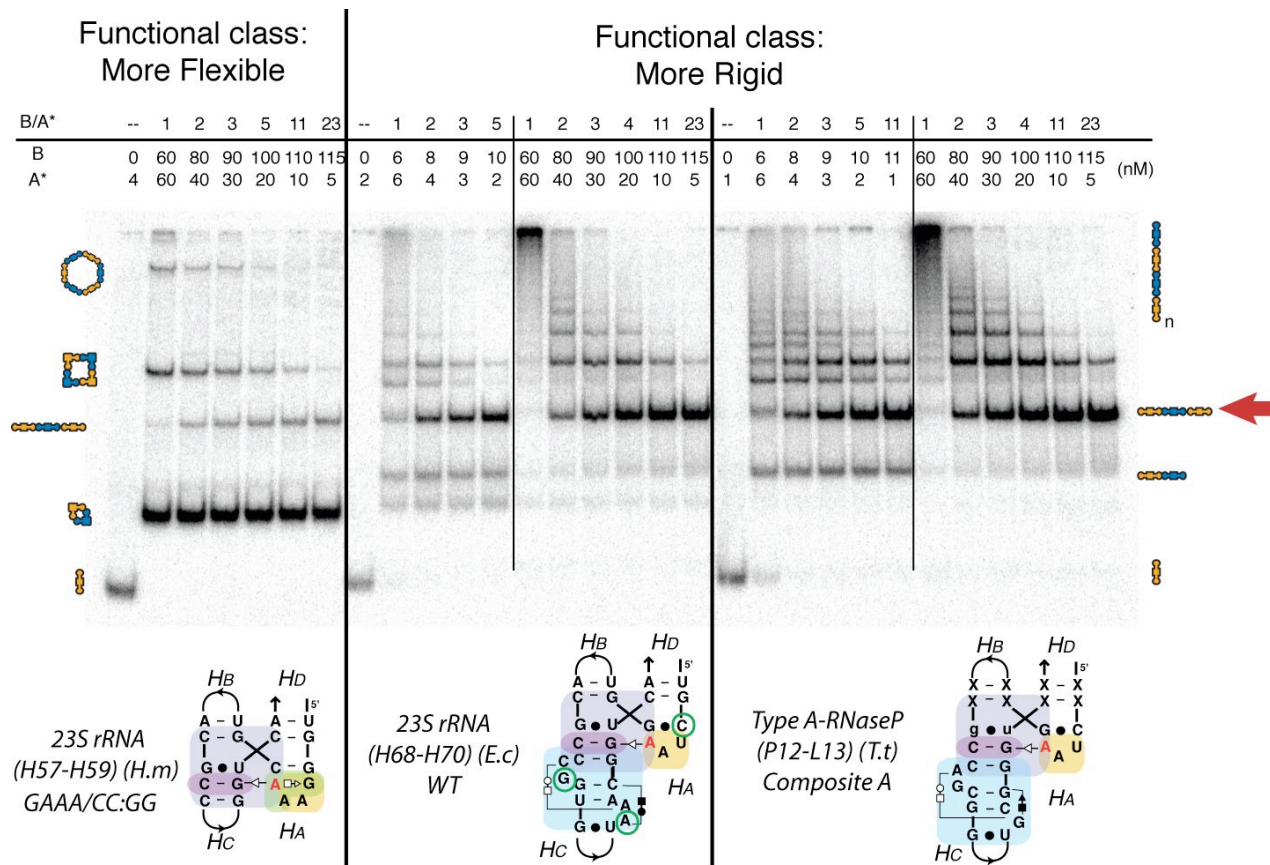

Figure S9

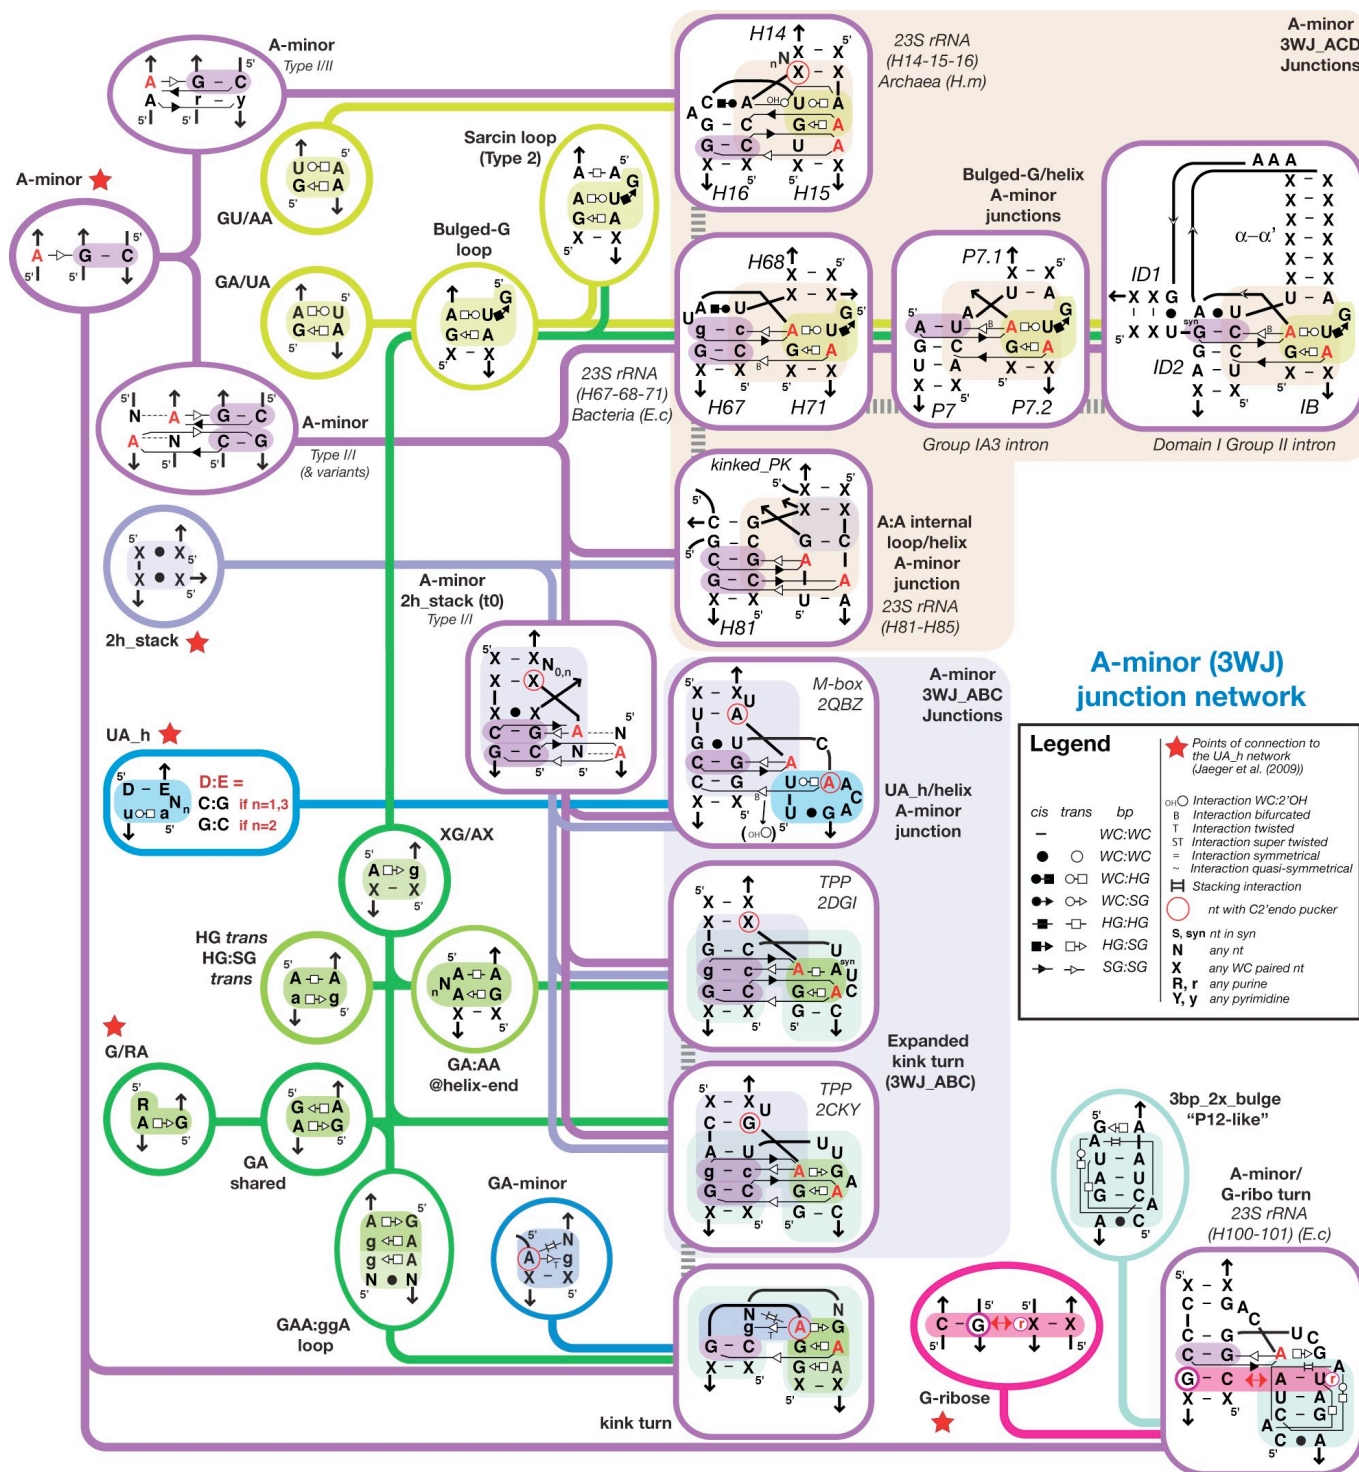

Figure S10
